# Supplementary material
Source: PubMed Central journal article supplement (PMC8284023)
Supplement: NIHMS1714325-supplement-Supplemental_Digital_Content.pdf [file NIHMS1714325-supplement-Supplemental_Digital_Content.pdf]

## Supplementary Figure 1: Pre-specified regressions and variables utilized in model development and prediction

### A. Regressions

- Sample mean

#### Generalized Linear Models:

- Including the infection status for each additional worm
- Including total number of worm infection types
- With splines for age, viral load, and hemoglobin
- Step Forward
- Step Forward + two-way interactions
- Elastic-net regularized + two-way interactions stratified by HIV status

#### Nonparametric:

- Ranger: Mtry (2, 4, 6)
- Xgboost: Max tree depths (2, 4, 6)
- rpartPrune
- Cross Validated Earth (5 fold)

### B. Variables

- Age
- Biological sex
- Recruitment site
- Hemoglobin
- Pregnant
- Malaria infection
- Any helminth infection
- Ascaris infection
- Trichuris infection
- Hookworm infection
- Number of helminth species
- HIV status
- Viral load

**A. Regressions.** Sample mean serves as a simple benchmark algorithm for prediction. Generalized linear models were user-generated as indicated. Nonparametric regressions were available within the SuperLearner package and were implemented with the hyperparameter values indicated in parenthesis. **B. Variables.** Variables which had the potential to confound the results and were available for all participants were included in model development and prediction.

**Supplementary Figure 2: CD4 Count Sensitivity Analysis of Estimated Distribution of Mtb Infection Outcomes**

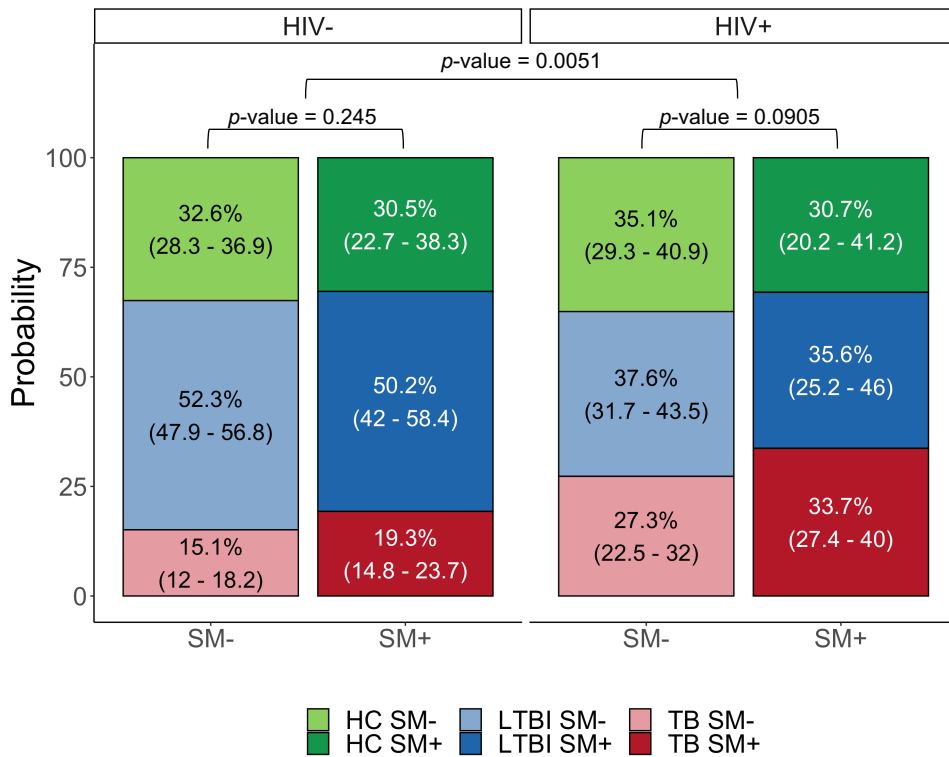

Probabilities are derived from TMLE estimation and are represented as stacked bar plots  $\pm$  95% confidence interval. Standard error estimates were obtained using estimated influence functions and the delta method. Significance level was calculated using Wald tests. The distribution of Mtb infection outcomes differs between SM<sup>-</sup> and SM<sup>+</sup> HIV<sup>+</sup> accounting for CD4 counts in HIV<sup>+</sup> individuals.
